# Supplementary material
Source: MDPI journal article supplement (https://www.mdpi.com/2073-4441/15/14/2665)
Supplement: s1 [file s1 › water-2444026-supplementary.pdf]

## Supplementary Materials

### Figures

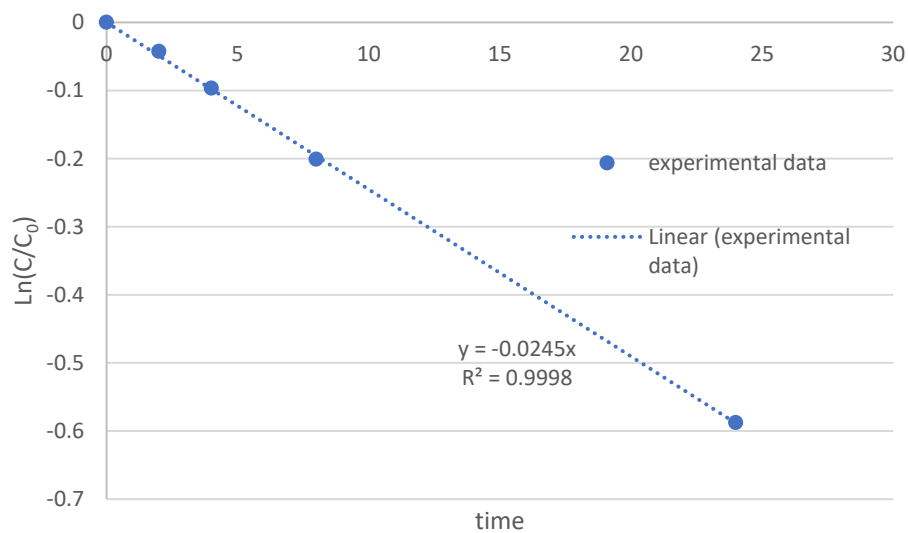

**Figure S1: Linearization of DFC concentration. Experiment without zeolite. Initial DFC concentration = 100 µg/L.**

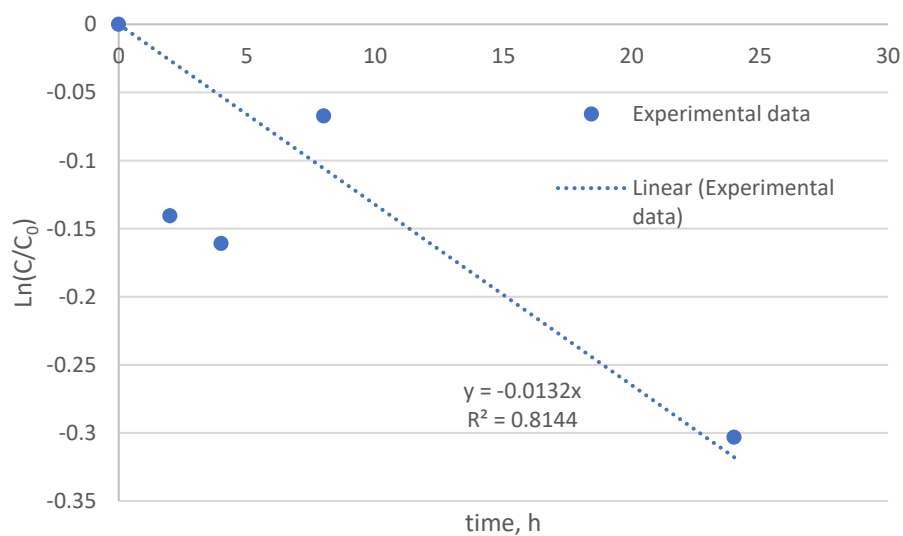

**Figure S2: Linearization of DFC concentration. Experiment with zeolite. Initial DFC concentration = 100 µg/L.**

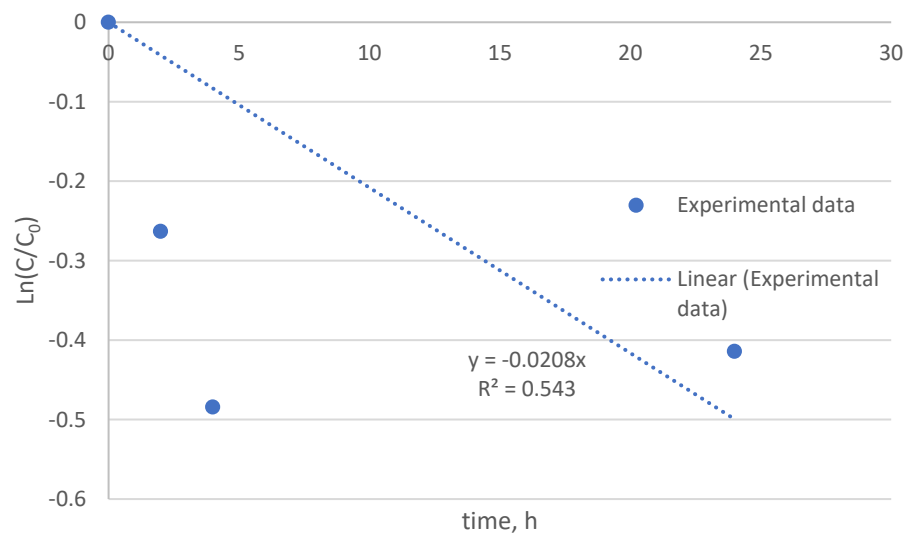

**Figure S3: Linearization of DFC concentration. Experiment without zeolite. Initial DFC concentration = 10  $\mu\text{g/L}$ .**

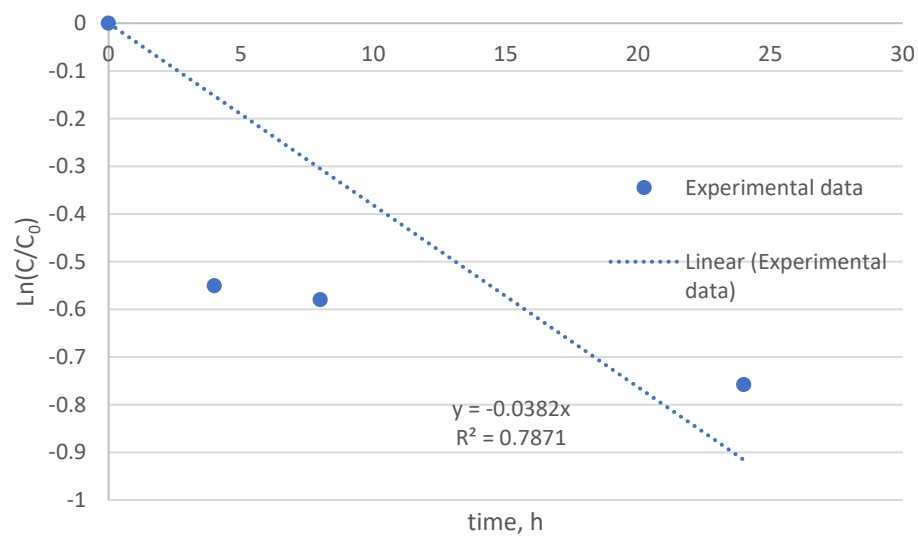

**Figure S4: Linearization of DFC concentration. Experiment with zeolite. Initial DFC concentration = 10  $\mu\text{g/L}$ .**

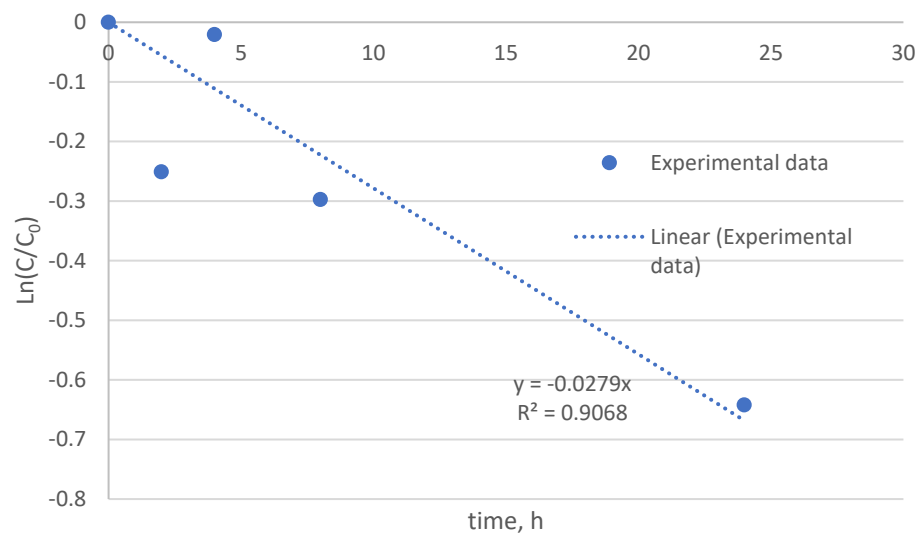

**Figure S5: Linearization of IBP concentration. Experiment without zeolite. Initial DFC concentration = 700 µg/L.**

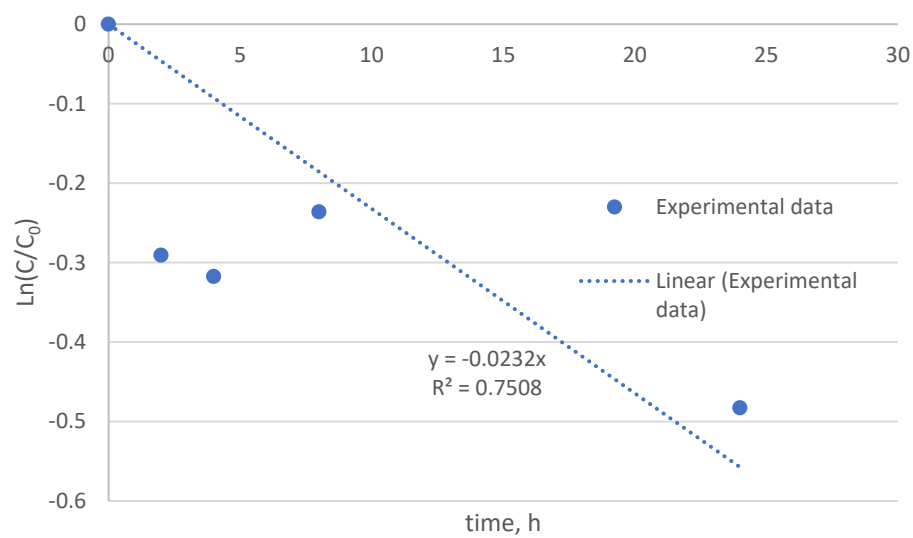

**Figure S6: Linearization of IBP concentration. Experiment with zeolite. Initial DFC concentration = 700 µg/L.**

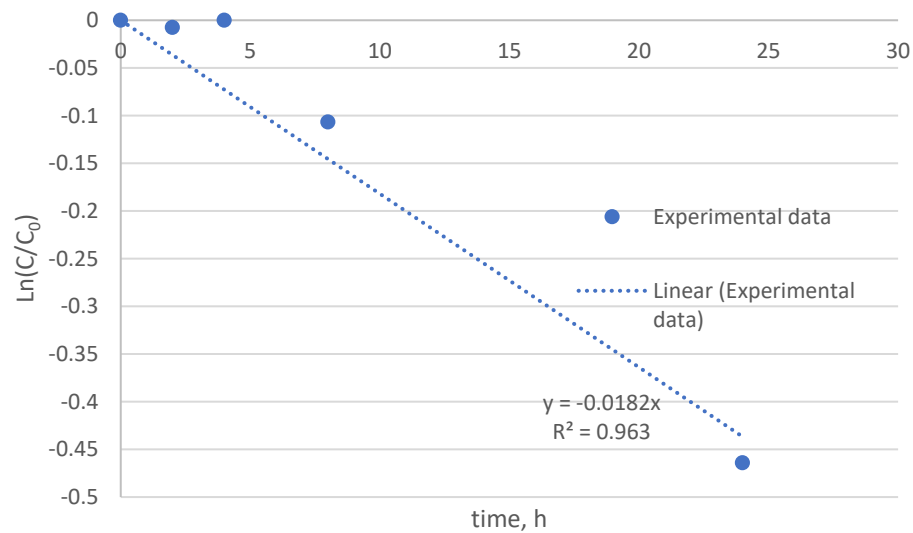

**Figure S7: Linearization of IBP concentration. Control experiment without zeolite, with biomass and with ATU. Initial DFC concentration = 700 µg/L.**

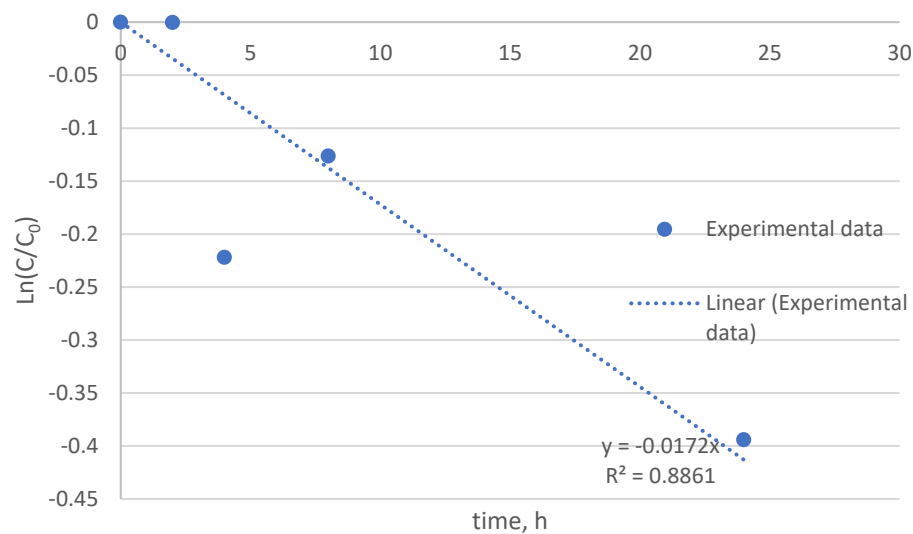

**Figure S8: Linearization of IBP concentration. Control experiment with zeolite, with biomass and with ATU. Initial DFC concentration = 700 µg/L.**

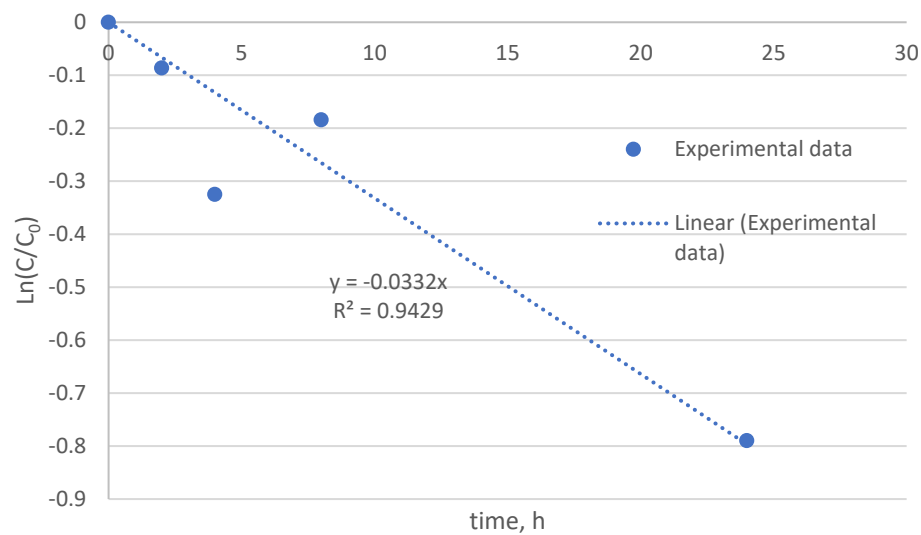

**Figure S9: Linearization of IBP concentration. Experiment without zeolite. Initial DFC concentration = 30  $\mu\text{g/L}$ .**

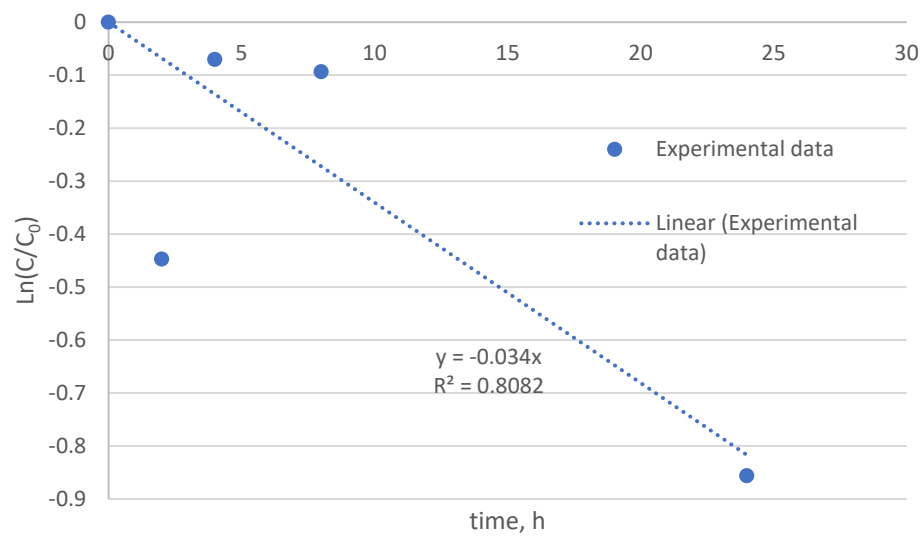

**Figure S10: Linearization of IBP concentration. Experiment with zeolite. Initial DFC concentration = 30  $\mu\text{g/L}$ .**

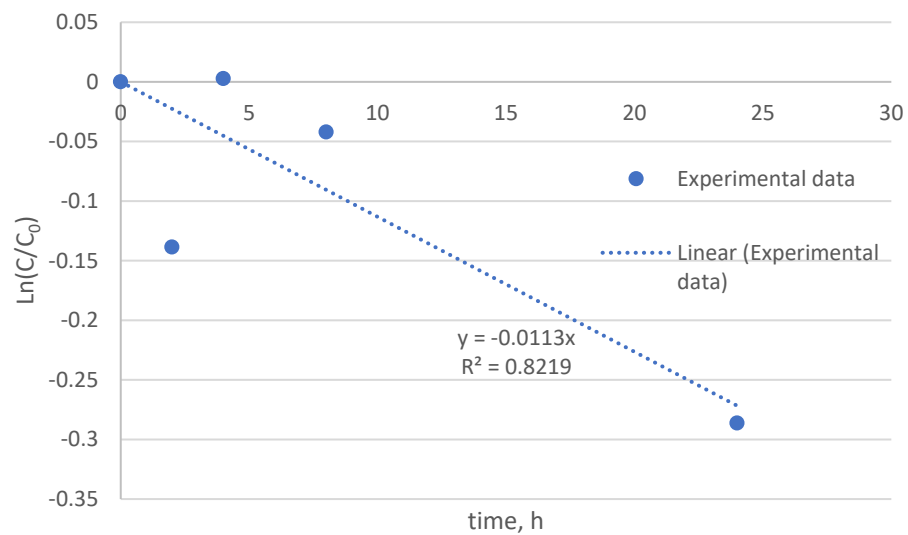

**Figure S11: Linearization of IBP concentration. Control experiment without zeolite, with biomass and with ATU. Initial DFC concentration = 30 µg/L.**
